# Supplementary material
Source: Springer Nature journal article supplement (https://www.springermedizin.de/resource/supplementary/13058_2013_3261_MOESM2_ESM.pdf/9703714)
Supplement: MOESM2 [file 9703714]

2007

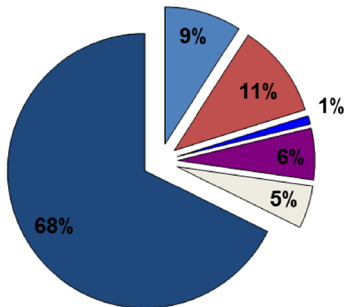

BRCA1

BRCA2

TP53/STK11/CDH1/PTEN

CHEK2/ATM/BRIP/PLB

GWAS SNPs

other

2013

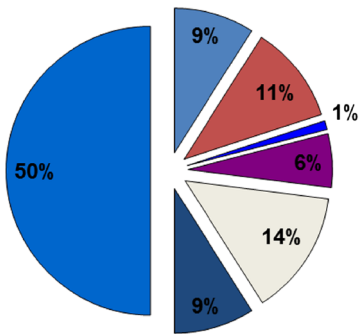

BRCA1

BRCA2

TP53/STK11/CDH1/PTEN

CHEK2/ATM/BRIP/PLB

GWAS SNPs

iCOG estimated

other
